# Supplementary material
Source: publisher figshare collection journal article supplement (https://asha.figshare.com/articles/dataset/_/9808361)
Supplement: Supplementary file 1 [file 1]

**Supplemental Material S2.** List of quality scores for each article included in the systematic review.

| Article                                             | Quality Score |
|-----------------------------------------------------|---------------|
| Dodd and McIntosh (2008)                            | 98%           |
| Strömbergsson, Wengelin, and House (2014)           | 96%           |
| Sutherland and Gillon (2005)                        | 96%           |
| Rvachew, Ohberg, Grawburg, and Heyding (2003)       | 94%           |
| Rvachew (1994)                                      | 93%           |
| Dodd, McIntosh, Erdener, and Burnham (2008)*        | 92%           |
| Rvachew and Grawburg (2006)                         | 91%           |
| Bird and Bishop (1992)                              | 90%           |
| Rvachew, Nowak, and Cloutier (2004)                 | 90%           |
| Rvachew (2006)                                      | 89%           |
| Shiller, Rvachew, and Brosseau-Lapré (2010)         | 89%           |
| Jamieson and Rvachew (1992)                         | 88%           |
| Sutherland and Gillon (2007)                        | 88%           |
| Monnin and Huntington (1974)                        | 86%           |
| Nathan, Stackhouse, Goulondris, and Snowling (2004) | 86%           |
| Rvachew (2007)                                      | 86%           |
| McGregor and Schwartz (1992)                        | 84%           |
| Wolfe, Presley, and Mesaris (2003)                  | 84%           |
| Edwards, Fox, and Rogers (2002)                     | 84%           |
| Nathan and Wells (2001)                             | 84%           |
| Geronikou and Rees (2016)                           | 83%           |
| Edwards, Fourakis, Beckman, and Fox (1999)          | 82%           |
| Nijland (2009)                                      | 82%           |
| Rvachew, Rafaat, and Martin (1999)*                 | 82%           |
| Panagos and King (1975)                             | 81%           |
| Rvachew and Jamieson (1989)                         | 81%           |
| Strömbergsson (2013)                                | 81%           |
| Waldman, Singh, and Hayden (1978)                   | 80%           |
| Smit and Bernthal (1983a)                           | 80%           |
| Marquardt and Saxman (1972)                         | 79%           |
| DeMarco, Harbour, Hume, and Givens (1989)           | 78%           |
| Ohde and Sharf (1988)                               | 77%           |
| Chaney (1988)                                       | 76%           |
| Nathan, Stackhouse, and Goulondris (1998)           | 76%           |
| Hoffman and Damico (1988)                           | 75%           |
| Grawburg and Rvachew (2007)                         | 74%           |
| Hoffman, Daniloff, Alfonso, and Schuckers (1984)    | 74%           |
| Bernthal, Greenlee, Eblen, and Marking (1987)       | 73%           |
| Carroll and Snowling (2004)                         | 72%           |
| Hoffman, Daniloff, Bengoa, and Schuckers (1985)     | 71%           |

|                                                                    |     |
|--------------------------------------------------------------------|-----|
| Lof (1996)                                                         | 70% |
| McNutt and Whelan (1990)                                           | 70% |
| Broen, Strange, Doyle, and Heller (1983)                           | 70% |
| Morgan (1984)                                                      | 70% |
| Raaymakers and Crul (1988)                                         | 70% |
| Haggard, Corrigall, and Legg (1971)                                | 70% |
| Attoni, Quintas, and Mota (2010)                                   | 69% |
| Dodd, Leahy, and Hambly (1989)                                     | 67% |
| Prins (1963)                                                       | 67% |
| Allison (1975)                                                     | 66% |
| Tyler and McOmber (1999)                                           | 66% |
| Santos-Carvalho, Mota, Keske-Soares, and Attoni (2010)             | 65% |
| de Freitas, Mezzomo, and Vidor (2015)                              | 64% |
| Winitz and Bellerose (1968)                                        | 64% |
| Locke and Kutz (1975)                                              | 63% |
| McReynolds, Kohn, and Williams (1975)                              | 63% |
| Brancalioni, Bertagnolli, Bonini, Gubiani, and Keske-Soares (2012) | 61% |
| Lapko and Bankson (1975)                                           | 61% |
| Tyler (1995)                                                       | 61% |
| Hutchinson (1968)                                                  | 58% |
| Schissel and McDonald (1980)                                       | 58% |
| Travis and Rasmus (1931)                                           | 58% |
| McAllister Byun (2012)                                             | 58% |
| Cohen and Diehl (1963)                                             | 56% |
| Hutchinson and Clark (1968)                                        | 56% |
| Tyler, Edwards, and Saxman (1990)                                  | 55% |
| Farquhar (1961)                                                    | 54% |
| Sommers, Cox, and West (1972)                                      | 50% |
| Orchik and Oelschlaeger (1977)                                     | 46% |
| Lucas (1983)                                                       | 44% |
| Smit and Bernthal (1983b)                                          | 29% |

---

\*Article includes 2 relevant studies

## References

- Allison, G. (1975). The relationship between articulation disorders and self-monitoring auditory discrimination. *Journal of Communication Disorders*, 8(4), 349-356.  
[https://doi.org/10.1016/0021-9924\(75\)90036-2](https://doi.org/10.1016/0021-9924(75)90036-2)
- Attoni, T. M., Quintas, V. G., & Mota, H. B. (2010). Evaluation of auditory processing and phonemic discrimination in children with normal and disordered phonological development. *Brazilian Journal of Otorhinolaryngology*, 76(6), 762-768.  
<https://doi.org/10.1590/S1808-86942010000600015>

- Bernthal, J. E., Greenlee, M., Eblen, R., & Marking, K. (1987). Detection of mispronunciations: A comparison of adults, normal-speaking children, and children with articulation errors. *Applied Psycholinguistics*, 8(3), 209-222. <https://doi.org/10.1017/S0142716400000266>
- Bird, J., & Bishop, D. (1992). Perception and awareness of phonemes in phonologically impaired children. *European Journal of Disorders of Communication*, 27(4), 289-311. <https://doi.org/10.3109/13682829209012042>
- Brancalioni, A. R., Bertagnolli, A. P. C., Bonini, J. B., Gubiani, M. B., & Keske-Soares, M. (2012). The relation between auditory discrimination and phonological disorder. *Jornal da Sociedade Brasileira de Fonoaudiologia*, 24(2), 157-161. <https://doi.org/10.1590/S2179-64912012000200012>
- Broen, P. A., Strange, W., Doyle, S. S., & Heller, J. H. (1983). Perception and production of approximant consonants by normal and articulation-delayed preschool children. *Journal of Speech and Hearing Research*, 26(4), 601-608. <https://doi.org/10.1044/jshr.2604.601>
- Carroll, J. M., & Snowling, M. J. (2004). Language and phonological skills in children at high risk of reading difficulties. *Journal of Child Psychology and Psychiatry*, 45(3), 631-640. <https://doi.org/10.1111/j.1469-7610.2004.00252.x>
- Chaney, C. (1988). Identification of correct and misarticulated semivowels. *Journal of Speech and Hearing Disorders*, 53(3), 252-261. <https://doi.org/10.1044/jshd.5303.252>
- Cohen, J. H., & Diehl, C. F. (1963). Relation of speech-sound discrimination ability to articulation-type speech defects. *Journal of Speech and Hearing Disorders*, 28(2), 187-190. <https://doi.org/10.1044/jshd.2802.187>
- de Freitas, C. R., Mezzomo, C. L., & Vidor, D. C. G. M. (2015). Phonemic discrimination and the relationship with other linguistic levels in children with typical phonological development and phonological disorder. *CODAS*, 27(3), 236-241. <https://doi.org/10.1590/2317-1782/20152014168>
- DeMarco, S., Harbour, A., Hume, W. G., & Givens, G. D. (1989). Perception of time-altered monosyllables in a specific group of phonologically disordered children. *Neuropsychologia*, 27(5), 753-757. [https://doi.org/10.1016/0028-3932\(89\)90122-X](https://doi.org/10.1016/0028-3932(89)90122-X)
- Dodd, B., Leahy, J., & Hambly, G. (1989). Phonological disorders in children: Underlying cognitive deficits. *British Journal of Developmental Psychology*, 7(1), 55-71. <https://doi.org/10.1111/j.2044-835X.1989.tb00788.x>
- Dodd, B., & McIntosh, B. (2008). The input processing, cognitive linguistic and oro-motor skills of children with speech difficulty. *International Journal of Speech-Language Pathology*, 10(3), 169-178. <https://doi.org/10.1080/14417040701682076>
- Dodd, B., McIntosh, B., Erdener, D., & Burnham, D. (2008). Perception of the auditory-visual illusion in speech perception by children with phonological disorders. *Clinical Linguistics and Phonetics*, 22(1), 69-82. <https://doi.org/10.1080/02699200701660100>
- Edwards, J., Fourakis, M., Beckman, M. E., & Fox, R. A. (1999). Characterizing knowledge deficits in phonological disorders. *Journal of Speech, Language, and Hearing Research*, 42(1), 169-186. <https://doi.org/10.1044/jslhr.4201.169>
- Edwards, J., Fox, R. A., & Rogers, C. L. (2002). Final consonant discrimination in children: Effects of phonological disorder, vocabulary size, and articulatory accuracy. *Journal of Speech, Language, and Hearing Research*, 45(2), 231-242. [https://doi.org/10.1044/1092-4388\(2002/018\)](https://doi.org/10.1044/1092-4388(2002/018))
- Farquhar, M. S. (1961). Prognostic value of imitative and auditory discrimination tests. *Journal of Speech and Hearing Disorders*, 26(4), 342-347. <https://doi.org/10.1044/jshd.2604.342>

- Geronikou, E., & Rees, R. (2016). Psycholinguistic profiling reveals underlying impairments for Greek children with speech disorders. *Child Language Teaching and Therapy*, 32(1), 95-110. <https://doi.org/10.1177/0265659015583915>
- Grawburg, M., & Rvachew, S. (2007). Phonological awareness intervention for preschoolers with speech and sound disorders. *Canadian Journal of Speech-Language Pathology and Audiology*, 31(1), 19-26.
- Haggard, M. P., Corrigan, J. M., & Legg, A. G. (1971). Perceptual factors in articulatory defects. *Folia Phoniatrica et Logopaedica*, 23(1), 33-40. <https://doi.org/10.1159/000263480>
- Hoffman, P. R., & Damico, S. K. (1988). Cluster-reducing children's identification and production of /sk/ clusters. *Clinical Linguistics and Phonetics*, 2(1), 17-27. <https://doi.org/10.3109/02699208808985241>
- Hoffman, P. R., Daniloff, R. G., Alfonso, P. J., & Schuckers, G. H. (1984). Multiple-phoneme-misarticulating children's perception and production of voice onset time. *Perceptual and Motor Skills*, 58(2), 603-610. <https://doi.org/10.2466/pms.1984.58.2.603>
- Hoffman, P. R., Daniloff, R. G., Bengoa, D., & Schuckers, G. H. (1985). Misarticulating and normally articulating children's identification and discrimination of synthetic [r] and [w]. *Journal of Speech and Hearing Disorders*, 50(1), 46-53. <https://doi.org/10.1044/jshd.5001.46>
- Hutchinson, B. B. (1968). Self-monitoring of articulation responses in sound discrimination tests. *Journal of Communication Disorders*, 1(4), 297-304. [https://doi.org/10.1016/0021-9924\(68\)90002-6](https://doi.org/10.1016/0021-9924(68)90002-6)
- Hutchinson, B. B., & Clark, D. W. (1968). Auditory and visual discrimination skills of normal and articulation-defective children. *Perceptual and Motor Skills*, 26(1), 259-265. <https://doi.org/10.2466/pms.1968.26.1.259>
- Jamieson, D. G., & Rvachew, S. (1992). Remediating speech production errors with sound identification training. *Journal of Speech-Language Pathology and Audiology*, 16(3), 201-210.
- Lapko, L. L., & Bankson, N. (1975). Relationship between auditory discrimination, articulation stimulability, and consistency of misarticulation. *Perceptual and Motor Skills*, 40(1), 171-177. <https://doi.org/10.2466/pms.1975.40.1.171>
- Locke, J. L., & Kutz, K. J. (1975). Memory for speech and speech for memory. *Journal of Speech and Hearing Research*, 18(1), 176-191. <https://doi.org/10.1044/jshr.1801.176>
- Lof, G. L. (1996). Factors associated with speech-sound stimulability. *Journal of Communication Disorders*, 29(4), 255-278. [https://doi.org/10.1016/0021-9924\(96\)00013-5](https://doi.org/10.1016/0021-9924(96)00013-5)
- Lucas, S. A. (1983). An investigation into the importance of lip-read information for phonologically deviant children. *International Journal of Rehabilitation Research*, 6(3), 342-343. <https://doi.org/10.1097/00004356-198309000-00009>
- Marquardt, T. P., & Saxman, J. H. (1972). Language comprehension and auditory discrimination in articulation deficient kindergarten children. *Journal of Speech and Hearing Research*, 15(2), 382-389. <https://doi.org/10.1044/jshr.1502.382>
- McAllister Byun, T. (2012). Bidirectional perception-production relations in phonological development: Evidence from positional neutralization. *Clinical Linguistics and Phonetics*, 26(5), 397-413. <https://doi.org/10.3109/02699206.2011.641060>
- McGregor, K. K., & Schwartz, R. G. (1992). Converging evidence for underlying phonological representation in a child who misarticulates. *Journal of Speech and Hearing Research*, 35(3), 596-603. <https://doi.org/10.1044/jshr.3503.596>

- McNutt, J. C., & Whelan, D. S. (1990). Phonological judgement in children with phonological disorders. *Journal of Speech-Language Pathology and Audiology*, 14(3), 41-47.
- McReynolds, L. V., Kohn, J., & Williams, G. C. (1975). Articulatory defective children's discrimination of their production errors. *Journal of Speech and Hearing Disorders*, 40(3), 327-338. <https://doi.org/10.1044/jshd.4003.327>
- Monnin, L. M., & Huntington, D. A. (1974). Relationship of articulatory defects to speech-sound identification. *Journal of Speech and Hearing Research*, 17(3), 352-366. <https://doi.org/10.1044/jshr.1703.352>
- Morgan, R. A. (1984). Auditory discrimination in speech-impaired and normal children as related to age. *British Journal of Disorders of Communication*, 19(1), 89-96. <https://doi.org/10.3109/13682828409019839>
- Nathan, L., Stackhouse, J., & Goulandris, N. (1998). Speech processing abilities in children with speech vs speech and language difficulties. *International Journal of Language and Communication Disorders*, 33(Suppl), 457-462. <https://doi.org/10.3109/13682829809179468>
- Nathan, L., Stackhouse, J., Goulandris, N., & Snowling, M. J. (2004). The development of early literacy skills among children with speech difficulties: A test of the "Critical Age Hypothesis". *Journal of Speech, Language, and Hearing Research*, 47(2), 377-391. [https://doi.org/10.1044/1092-4388\(2004/031\)](https://doi.org/10.1044/1092-4388(2004/031))
- Nathan, L., & Wells, B. (2001). Can children with speech difficulties process an unfamiliar accent? *Applied Psycholinguistics*, 22(3), 343-361. <https://doi.org/10.1017/S0142716401003046>
- Nijland, L. (2009). Speech perception in children with speech output disorders. *Clinical Linguistics and Phonetics*, 23(3), 222-239. <https://doi.org/10.1080/02699200802399947>
- Ohde, R. N., & Sharf, D. J. (1988). Perceptual categorization and consistency of synthesized /r-w/ continua by adults, normal children and /r/-misarticulating children. *Journal of Speech and Hearing Research*, 31(4), 556-568. <https://doi.org/10.1044/jshr.3104.556>
- Orchik, D. J., & Oelschlaeger, M. L. (1977). Time-compressed speech discrimination in children and its relationship to articulation. *Journal of the American Audiology Society*, 3(1), 37-41.
- Panagos, J. M., & King, R. R. (1975). Self and mutual speech comprehension by deviant- and normal-speaking children. *Journal of Speech and Hearing Research*, 18(4), 653-662. <https://doi.org/10.1044/jshr.1804.653>
- Prins, D. (1963). Relations among specific articulatory deviations and responses to a clinical measure of sound discrimination ability. *Journal of Speech and Hearing Disorders*, 28(4), 382-388. <https://doi.org/10.1044/jshd.2804.382>
- Raaymakers, E. M. J. A., & Crul, T. A. M. (1988). Perception and production of the final /s-ts/ contrast in Dutch by misarticulating children. *Journal of Speech and Hearing Disorders*, 53(3), 262-270. <https://doi.org/10.1044/jshd.5303.262>
- Rvachew, S. (1994). Speech perception training can facilitate sound production learning. *Journal of Speech and Hearing Research*, 37(2), 347-357. <https://doi.org/10.1044/jshr.3702.347>
- Rvachew, S. (2006). Longitudinal predictors of implicit phonological awareness skills. *American Journal of Speech-Language Pathology*, 15(2), 165-176. [https://doi.org/10.1044/1058-0360\(2006/016\)](https://doi.org/10.1044/1058-0360(2006/016))
- Rvachew, S. (2007). Phonological processing and reading in children with speech sound disorders. *American Journal of Speech-Language Pathology*, 16(3), 260-270. [https://doi.org/10.1044/1058-0360\(2007/030\)](https://doi.org/10.1044/1058-0360(2007/030))

- Rvachew, S., & Grawburg, M. (2006). Correlates of phonological awareness in preschoolers with speech sound disorders. *Journal of Speech, Language, and Hearing Research*, 49(1), 74-87. [https://doi.org/10.1044/1092-4388\(2006/006\)](https://doi.org/10.1044/1092-4388(2006/006))
- Rvachew, S., & Jamieson, D. G. (1989). Perception of voiceless fricatives by children with a functional articulation disorder. *Journal of Speech and Hearing Disorders*, 54(2), 193-208. <https://doi.org/10.1044/jshd.5402.193>
- Rvachew, S., Nowak, M., & Cloutier, G. (2004). Effect of phonemic perception training on the speech production and phonological awareness skills of children with expressive phonological delay. *American Journal of Speech-Language Pathology*, 13(3), 250-263. [https://doi.org/10.1044/1058-0360\(2004/026\)](https://doi.org/10.1044/1058-0360(2004/026))
- Rvachew, S., Ohberg, A., Grawburg, M., & Heyding, J. (2003). Phonological awareness and phonemic perception in 4-year-old children with delayed expressive phonology skills. *American Journal of Speech-Language Pathology*, 12(4), 463-471. [https://doi.org/10.1044/1058-0360\(2003/092\)](https://doi.org/10.1044/1058-0360(2003/092))
- Rvachew, S., Rafaat, S., & Martin, M. (1999). Stimulability, speech perception skills, and the treatment of phonological disorders. *American Journal of Speech-Language Pathology*, 8(1), 33-43. <https://doi.org/10.1044/1058-0360.0801.33>
- Santos-Carvalho, B. D., Mota, H. B., Keske-Soares, M., & Attoni, T. M. (2010). Hearing discrimination abilities in children with phonological disorders. *Pro-Fono*, 22(3), 311-316. <https://doi.org/10.1590/S0104-56872010000300026>
- Schissel, R. J., & McDonald, E. T. (1980). Effects of time between stimuli on the relationship of speech-sound discrimination skills to consistency of correct production of [s] and [r]. *Journal of Communication Disorders*, 13(1), 83-91. [https://doi.org/10.1016/0021-9924\(80\)90025-8](https://doi.org/10.1016/0021-9924(80)90025-8)
- Shiller, D. M., Rvachew, S., & Brosseau-Lapr , F. (2010). Importance of the auditory perceptual target to the achievement of speech production accuracy. *Canadian Journal of Speech-Language Pathology and Audiology*, 34(3), 181-192.
- Smit, A. B., & Bernthal, J. E. (1983a). Performance of articulation-disordered children on language and perception measures. *Journal of Speech and Hearing Research*, 26(1), 124-136. <https://doi.org/10.1044/jshr.2601.124>
- Smit, A. B., & Bernthal, J. E. (1983b). Voicing contrasts and their phonological implications in the speech of articulation-disordered children. *Journal of Speech and Hearing Research*, 26(4), 486-500. <https://doi.org/10.1044/jshr.2604.486>
- Sommers, R. K., Cox, S., & West, C. (1972). Articulatory effectiveness, stimulability, and children's performances on perceptual and memory tasks. *Journal of Speech, Language, and Hearing Research*, 15(3), 579-589. <https://doi.org/10.1044/jshr.1503.579>
- Str mbergsson, S. (2013). Children's recognition of their own recorded voice: Influence of age and phonological impairment. *Clinical Linguistics and Phonetics*, 27(1), 33-45. <https://doi.org/10.3109/02699206.2012.735744>
- Str mbergsson, S., Wengelin, A., & House, D. (2014). Children's perception of their synthetically corrected speech production. *Clinical Linguistics and Phonetics*, 28(6), 373-395. <https://doi.org/10.3109/02699206.2013.868928>
- Sutherland, D., & Gillon, G. T. (2005). Assessment of phonological representations in children with speech impairment. *Language, Speech, and Hearing Services in Schools*, 36(4), 294-307. [https://doi.org/10.1044/0161-1461\(2005/030\)](https://doi.org/10.1044/0161-1461(2005/030))
- Sutherland, D., & Gillon, G. T. (2007). Development of phonological representations and phonological awareness in children with speech impairment. *International Journal of Language and Communication Disorders*, 42(2), 229-250. <https://doi.org/10.1080/13682820600806672>

- Travis, L. E., & Rasmus, B. (1931). The speech sound discrimination ability of cases with functional disorders of articulation. *Quarterly Journal of Speech*, 17(2), 217-226. <https://doi.org/10.1080/00335633109379803>
- Tyler, A. A. (1995). Durational analysis of stridency errors in children with phonological impairment. *Clinical Linguistics and Phonetics*, 9(3), 211-228. <https://doi.org/10.3109/02699209508985333>
- Tyler, A. A., Edwards, M. L., & Saxman, J. H. (1990). Acoustic validation of phonological knowledge and its relationship to treatment. *Journal of Speech and Hearing Disorders*, 55(2), 251-261. <https://doi.org/10.1044/jshd.5502.251>
- Tyler, A. A., & McOmber, L. S. (1999). Examining phonological-morphological interactions with converging sources of evidence. *Clinical Linguistics and Phonetics*, 13(2), 131-156. <https://doi.org/10.1080/026992099299194>
- Waldman, F. R., Singh, S., & Hayden, M. E. (1978). A comparison of speech-sound production and discrimination in children with functional articulation disorders. *Language and Speech*, 21(3), 205-220. <https://doi.org/10.1177/002383097802100301>
- Winitz, H., & Bellerose, B. (1968). Relation between sound discrimination and sound learning. *Journal of Communication Disorders*, 1(3), 215-235. <https://doi.org/10.1016/0021-9924%2868%2990033-6>
- Wolfe, V., Presley, C., & Mesaris, J. (2003). The importance of sound identification training in phonological intervention. *American Journal of Speech-Language Pathology*, 12(3), 282-288. [https://doi.org/10.1044/1058-0360\(2003/074\)](https://doi.org/10.1044/1058-0360(2003/074))
